# Supplementary material
Source: publisher site journal article supplement (https://www.dovepress.com/article/389694)
Supplement: Supplementary file 1 [file get_supplementary_file.php]

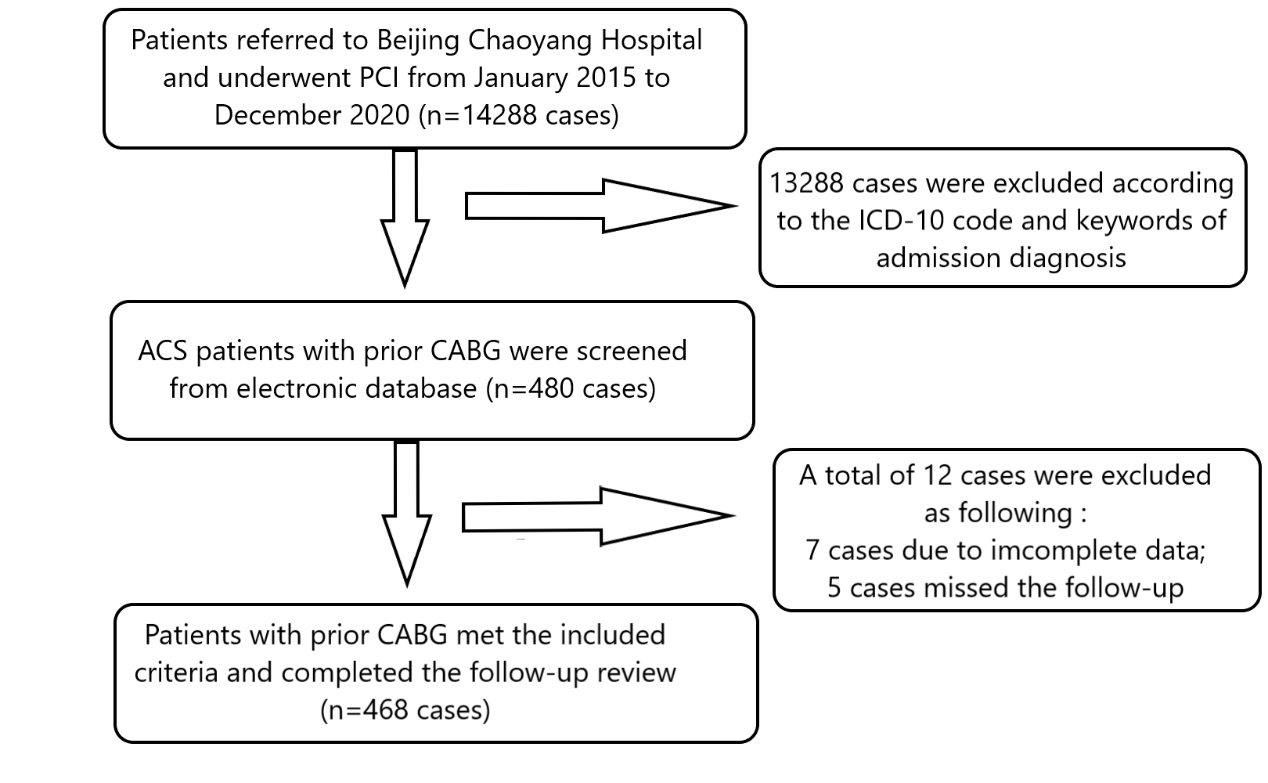


Supplementary Figure 1. The screening flowchart.


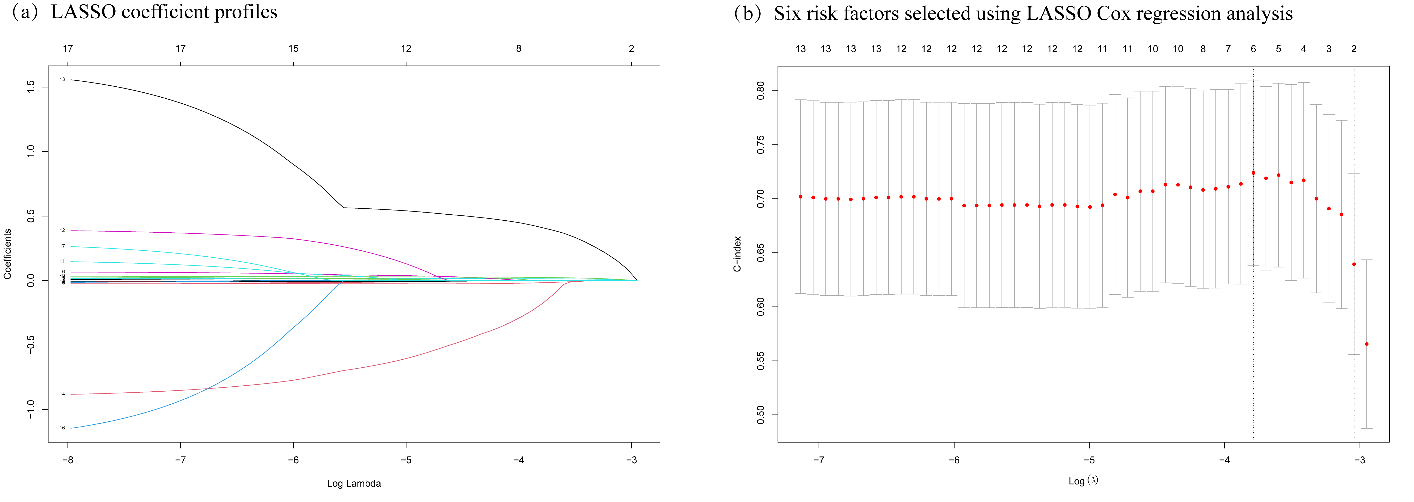


Supplementary Figure 2. (a) LASSO coefficient profiles of the 17 risk factors. (b) Six risk factors were selected using LASSO Cox regression analysis. The two dotted vertical lines were drawn at the optimal scores by the minimum and 1-s.e. criteria (including non-HDL, LVEF, peak of CTNI level, CCr, receiving β-blocker treatment, and ESR on admission).


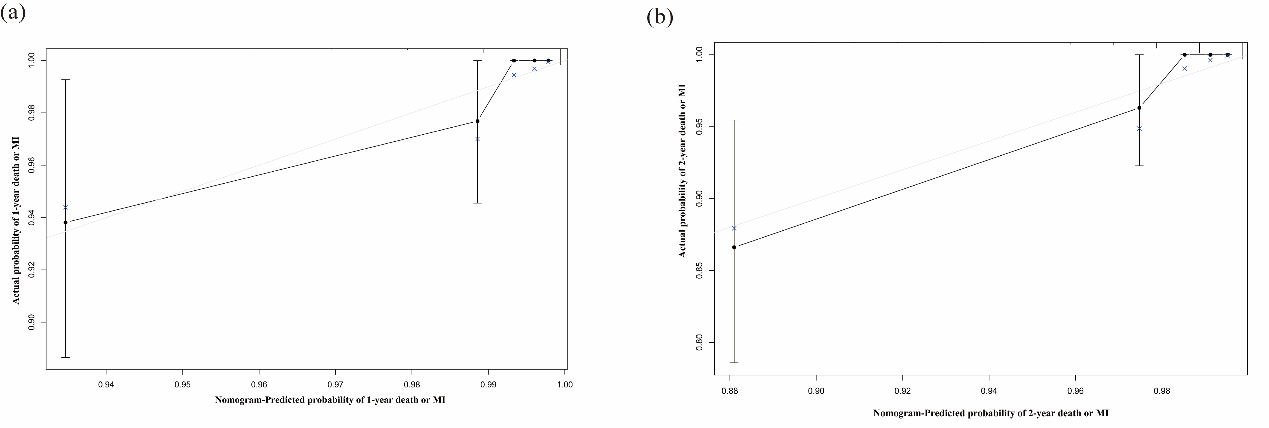


Supplementary Figure 3. Calibration plots of MACE-free probabilities at 12 (a) and 24 months (b).
